# Supplementary material for: Genetic and environmental effects on the scaling of metabolic rate with body size
Source: Oxford University Press journal article supplement (doi:10.1242/jeb.193243), 2019-01-01
Supplement: jeb193243supp.pdf [file jeb193243supp.pdf]

## Supporting Information

**Table S1.** Sample sizes per clone by temperature combination used in metabolic rate experiment for 10 clones from a population of *Daphnia magna*.

|      | EF19 | EF28 | EF49 | EF50 | EF58 | EF63 | EF64 | EF7 | EF86 | EF88 |
|------|------|------|------|------|------|------|------|-----|------|------|
| 17°C | 29   | 28   | 27   | 30   | 29   | 30   | 29   | 29  | 27   | 30   |
| 22°C | 26   | 28   | 25   | 27   | 25   | 25   | 28   | 25  | 23   | 24   |
| 28°C | 25   | 26   | 25   | 26   | 24   | 26   | 26   | 25  | 26   | 25   |

**Table S2.** Model selection using AICc of candidate models for metabolic rate allometry of 10 clones from a population of *Daphnia magna*. Models sorted by  $\Delta$  AICc. The best random effect structure was first determined with REML on models that included all listed fixed effects. Fixed effects were then compared with ML using the best random effect structure. MR = oxygen consumption ( $\text{mg h}^{-1}$ ), BM = body mass (mg), FT = last feeding time, T = temperature, K = number of parameters. The least complex model within 2  $\Delta$  AICc is bolded.

|                | Model                                                                                                                                    | K  | AICc    | $\Delta$ AICc | Akaike weights |
|----------------|------------------------------------------------------------------------------------------------------------------------------------------|----|---------|---------------|----------------|
| Fixed effects  | $\ln \text{MR} \sim \ln \text{BM} + \text{T} + \ln \text{BM:T} + \text{FT} + \text{plate}$                                               | 17 | -319.42 | 0.00          | 0.26           |
|                | $\ln \text{MR} \sim \ln \text{BM} + \text{T} + \ln \text{BM:T} + \text{FT} + \text{FT:T} + \text{plate}$                                 | 19 | -319.07 | 0.34          | 0.22           |
|                | <b><math>\ln \text{MR} \sim \ln \text{BM} + \text{T} + \ln \text{BM:T}</math></b>                                                        | 15 | -318.17 | 1.24          | 0.14           |
|                | $\ln \text{MR} \sim \ln \text{BM} + \text{T} + \ln \text{BM:T} + \text{FT} + \text{FT:BM} + \text{plate}$                                | 18 | -318.10 | 1.31          | 0.13           |
|                | $\ln \text{MR} \sim \ln \text{BM} + \text{T} + \ln \text{BM:T} + \text{FT} + \text{FT:BM} + \text{FT:T} + \text{plate}$                  | 20 | -317.76 | 1.66          | 0.11           |
|                | $\ln \text{MR} \sim \ln \text{BM} + \text{T} + \ln \text{BM:T} + \text{plate}$                                                           | 16 | -317.70 | 1.72          | 0.11           |
|                | $\ln \text{MR} \sim \ln \text{BM} + \text{T} + \ln \text{BM:T} + \text{FT} + \text{FT:BM} + \text{FT:T} + \text{FT:MB:T} + \text{plate}$ | 22 | -314.64 | 4.78          | 0.02           |
|                | $\ln \text{MR} \sim \ln \text{BM} + \text{T}$                                                                                            | 13 | -259.41 | 60.01         | 0.00           |
|                | $\ln \text{MR} \sim \ln \text{BM}$                                                                                                       | 11 | -214.41 | 105.01        | 0.00           |
|                | $\ln \text{MR} \sim \text{T}$                                                                                                            | 12 | 2240.96 | 2560.38       | 0.00           |
| Random effects | <b>(T   clone) + (1   run) + (1   well ID)</b>                                                                                           | 22 | -245.69 | 0.00          | 0.70           |
|                | (T   clone) + (ln BM   clone) + (1   run) + (1   well ID)                                                                                | 23 | -243.57 | 2.12          | 0.24           |
|                | (1   clone) + (1   run) + (1   well ID)                                                                                                  | 17 | -240.65 | 5.04          | 0.06           |
|                | (T   clone) + (T : ln BM   clone) + (1   run) + (1   well ID)                                                                            | 28 | -232.89 | 12.81         | 0.00           |
|                | (1   run) + (1   well ID)                                                                                                                | 16 | -221.53 | 24.16         | 0.00           |
|                | (T   clone) + (T : ln BM   clone) + (1   run)                                                                                            | 27 | -185.14 | 60.55         | 0.00           |
|                | (T   clone) + (T : ln BM   clone) + (1   well ID)                                                                                        | 27 | -62.75  | 182.94        | 0.00           |

**Table S3.** Model selection using AICc of candidate models for the effect of temperature on metabolic rate of 10 clones from a population of *Daphnia magna*. Metabolic rate was analyzed separately when standardized to a small versus a large body size. Models sorted by  $\Delta$  AICc. The best random effect structure was first determined with REML on models that included all listed fixed effects. Fixed effects were then compared with ML using the best random effect structure. MR = oxygen consumption ( $\text{mg h}^{-1}$ ), T = temperature, K = number of parameters. The best model is bolded.

| Body size | Model                                                                     | K | AICc    | $\Delta$ AICc | Akaike weights |
|-----------|---------------------------------------------------------------------------|---|---------|---------------|----------------|
| Small     | <b>ln MR ~ T</b>                                                          | 6 | -553.29 | 0.00          | 0.73           |
|           | Fixed effects ln MR ~ T + T <sup>2</sup>                                  | 7 | -551.32 | 1.97          | 0.27           |
|           | ln MR ~ 1                                                                 | 5 | -503.97 | 49.32         | 0.00           |
|           | Random effects <b>(1   clone) + (T   clone) + (T<sup>2</sup>   clone)</b> | 7 | -520.55 | 0.00          | 0.76           |
|           | (1   clone) + (T   clone)                                                 | 6 | -517.61 | 2.94          | 0.18           |
|           | (1   clone)                                                               | 5 | -515.56 | 4.99          | 0.06           |
| Large     | <b>ln MR ~ T + T<sup>2</sup></b>                                          | 7 | -551.32 | 0.00          | 0.99           |
|           | Fixed effects ln MR ~ T                                                   | 6 | -542.32 | 9.00          | 0.01           |
|           | ln MR ~ 1                                                                 | 5 | -499.51 | 51.81         | 0.00           |
|           | Random effects <b>(1   clone) + (T   clone) + (T<sup>2</sup>   clone)</b> | 7 | -520.55 | 0.00          | 0.76           |
|           | (1   clone) + (T   clone)                                                 | 6 | -517.61 | 2.94          | 0.18           |
|           | (1   clone)                                                               | 5 | -515.56 | 4.99          | 0.06           |

**Table S4.** Predicted and estimated parameters for metabolic rate allometry of 10 clones from a population of *Daphnia magna*. Two models were used: one mixed-effect model with clone as a random effect, ln oxygen consumption ( $\text{mg h}^{-1}$ ) as the response and ln body mass (mg) as a covariate (full model given in Table S2), and one with clone as a fixed effect. For the model with clone as a random effect, parameters were fitted from BLUPs, and only intercepts are given for each clone since slopes were found to not differ significantly (Table S2). Within temperatures, clones have been sorted in descending order of the intercept BLUPs. Note that the order of clones differ somewhat between models due to the model with clones as a fixed effect not properly accounting for other random effects.

| Temperature (°C) | Clone  | Intercept from model with clone as random effect | Intercept ( $\pm$ SE) from model with clone as fixed effect | Slope ( $\pm$ SE) from model with clone as fixed effect |
|------------------|--------|--------------------------------------------------|-------------------------------------------------------------|---------------------------------------------------------|
| 17               | EF19   | -4.585                                           | -4.499 $\pm$ 0.067                                          | 0.993 $\pm$ 0.031                                       |
|                  | EF50   | -4.585                                           | -4.536 $\pm$ 0.067                                          | 0.938 $\pm$ 0.029                                       |
|                  | EF86   | -4.600                                           | -4.559 $\pm$ 0.067                                          | 0.921 $\pm$ 0.035                                       |
|                  | EF63   | -4.602                                           | -4.539 $\pm$ 0.066                                          | 0.934 $\pm$ 0.031                                       |
|                  | EF58   | -4.614                                           | -4.548 $\pm$ 0.068                                          | 0.924 $\pm$ 0.030                                       |
|                  | EF28   | -4.617                                           | -4.551 $\pm$ 0.067                                          | 0.988 $\pm$ 0.032                                       |
|                  | EF64   | -4.617                                           | -4.562 $\pm$ 0.066                                          | 0.946 $\pm$ 0.032                                       |
|                  | EF7    | -4.623                                           | -4.549 $\pm$ 0.067                                          | 0.965 $\pm$ 0.032                                       |
|                  | EF49   | -4.657                                           | -4.620 $\pm$ 0.068                                          | 0.914 $\pm$ 0.031                                       |
|                  | EF88   | -4.704                                           | -4.689 $\pm$ 0.066                                          | 0.918 $\pm$ 0.034                                       |
| 22               | EF86   | -4.595                                           | -4.528 $\pm$ 0.071                                          | 0.869 $\pm$ 0.035                                       |
|                  | EF49   | -4.627                                           | -4.540 $\pm$ 0.070                                          | 0.865 $\pm$ 0.033                                       |
|                  | EF58   | -4.636                                           | -4.549 $\pm$ 0.070                                          | 0.879 $\pm$ 0.032                                       |
|                  | EF19   | -4.656                                           | -4.583 $\pm$ 0.069                                          | 0.857 $\pm$ 0.032                                       |
|                  | EF88   | -4.660                                           | -4.595 $\pm$ 0.070                                          | 0.846 $\pm$ 0.033                                       |
|                  | EF50   | -4.661                                           | -4.634 $\pm$ 0.069                                          | 0.872 $\pm$ 0.035                                       |
|                  | EF63   | -4.681                                           | -4.638 $\pm$ 0.070                                          | 0.842 $\pm$ 0.035                                       |
|                  | EF7    | -4.693                                           | -4.623 $\pm$ 0.069                                          | 0.828 $\pm$ 0.035                                       |
|                  | EF64   | -4.694                                           | -4.656 $\pm$ 0.069                                          | 0.893 $\pm$ 0.034                                       |
| EF28             | -4.704 | -4.661 $\pm$ 0.070                               | 0.849 $\pm$ 0.030                                           |                                                         |
| 28               | EF86   | -4.195                                           | -4.110 $\pm$ 0.071                                          | 0.855 $\pm$ 0.032                                       |
|                  | EF19   | -4.269                                           | -4.219 $\pm$ 0.071                                          | 0.834 $\pm$ 0.035                                       |
|                  | EF58   | -4.277                                           | -4.227 $\pm$ 0.072                                          | 0.867 $\pm$ 0.031                                       |
|                  | EF50   | -4.282                                           | -4.202 $\pm$ 0.070                                          | 0.862 $\pm$ 0.031                                       |
|                  | EF49   | -4.313                                           | -4.259 $\pm$ 0.071                                          | 0.848 $\pm$ 0.033                                       |
|                  | EF63   | -4.334                                           | -4.280 $\pm$ 0.070                                          | 0.841 $\pm$ 0.032                                       |
|                  | EF64   | -4.372                                           | -4.320 $\pm$ 0.070                                          | 0.782 $\pm$ 0.032                                       |
|                  | EF7    | -4.378                                           | -4.346 $\pm$ 0.071                                          | 0.790 $\pm$ 0.034                                       |
|                  | EF28   | -4.388                                           | -4.345 $\pm$ 0.069                                          | 0.822 $\pm$ 0.035                                       |
| EF88             | -4.421 | -4.377 $\pm$ 0.071                               | 0.835 $\pm$ 0.031                                           |                                                         |

**Table S5.** Predicted parameters for the effect of temperature on metabolic rate of 10 clones from a population of *Daphnia magna* at two different sizes. The parameters are fitted from BLUPs of the random effects from a mixed-effect model with ln oxygen consumption ( $\text{mg h}^{-1}$ ) as the response. Clones differed significantly in the elevation and curvature of the reaction norms.

| Size  | Clone | Intercept | Slope | Quadratic term        |
|-------|-------|-----------|-------|-----------------------|
| Small | EF19  | -8.943    | 0.076 | $1.2 \times 10^{-3}$  |
|       | EF28  | -8.979    | 0.073 | $-0.2 \times 10^{-3}$ |
|       | EF49  | -8.947    | 0.080 | $-0.7 \times 10^{-3}$ |
|       | EF50  | -8.965    | 0.078 | $1.4 \times 10^{-3}$  |
|       | EF58  | -8.939    | 0.078 | $0.4 \times 10^{-3}$  |
|       | EF63  | -8.966    | 0.075 | $0.5 \times 10^{-3}$  |
|       | EF64  | -8.979    | 0.074 | $0.1 \times 10^{-3}$  |
|       | EF7   | -8.968    | 0.073 | $-0.4 \times 10^{-3}$ |
|       | EF86  | -8.926    | 0.083 | $1.4 \times 10^{-3}$  |
|       | EF88  | -8.976    | 0.079 | $-2.2 \times 10^{-3}$ |
| Large | EF19  | -7.223    | 0.053 | $3.5 \times 10^{-3}$  |
|       | EF28  | -7.260    | 0.050 | $2.1 \times 10^{-3}$  |
|       | EF49  | -7.227    | 0.058 | $1.5 \times 10^{-3}$  |
|       | EF50  | -7.245    | 0.055 | $3.7 \times 10^{-3}$  |
|       | EF58  | -7.220    | 0.056 | $2.6 \times 10^{-3}$  |
|       | EF63  | -7.246    | 0.053 | $2.8 \times 10^{-3}$  |
|       | EF64  | -7.260    | 0.052 | $2.4 \times 10^{-3}$  |
|       | EF7   | -7.249    | 0.051 | $1.9 \times 10^{-3}$  |
|       | EF86  | -7.207    | 0.061 | $3.6 \times 10^{-3}$  |
|       | EF88  | -7.256    | 0.057 | $0.1 \times 10^{-3}$  |
